# Supplementary material for: Influence of Age, Host Plant and Mating Status in Pheromone Production and New Insights on Perception Plasticity in Tuta Absoluta
Source: MDPI journal article supplement (doi:10.3390/insects10080256), 2019-08-20
Supplement: s1 [file s1]

## SUPPLEMENTARY MATERIAL

### **Influence of age, host plant and mating status in pheromone production and new insights on perception plasticity in *Tuta absoluta***

**Aroa Domínguez, Sergio López, Ana Bernabé, Ángel Guerrero\* and  
Carmen Quero\***

Department of Biological Chemistry, Institute of Advanced Chemistry of Catalonia (CSIC), Jordi Girona 18. 08034 Barcelona, Spain; [aroadc.87@gmail.com](mailto:aroadc.87@gmail.com) (A.D.) [slrqbm@cid.csic.es](mailto:slrqbm@cid.csic.es) (S.L.); [abernamu@gmail.com](mailto:abernamu@gmail.com) (A.B.).

\* Correspondence: [agpqob@cid.csic.es](mailto:agpqob@cid.csic.es) (A.G.); [cqlqob@cid.csic.es](mailto:cqlqob@cid.csic.es) (C.Q.); Tel. +34-93-4006171.

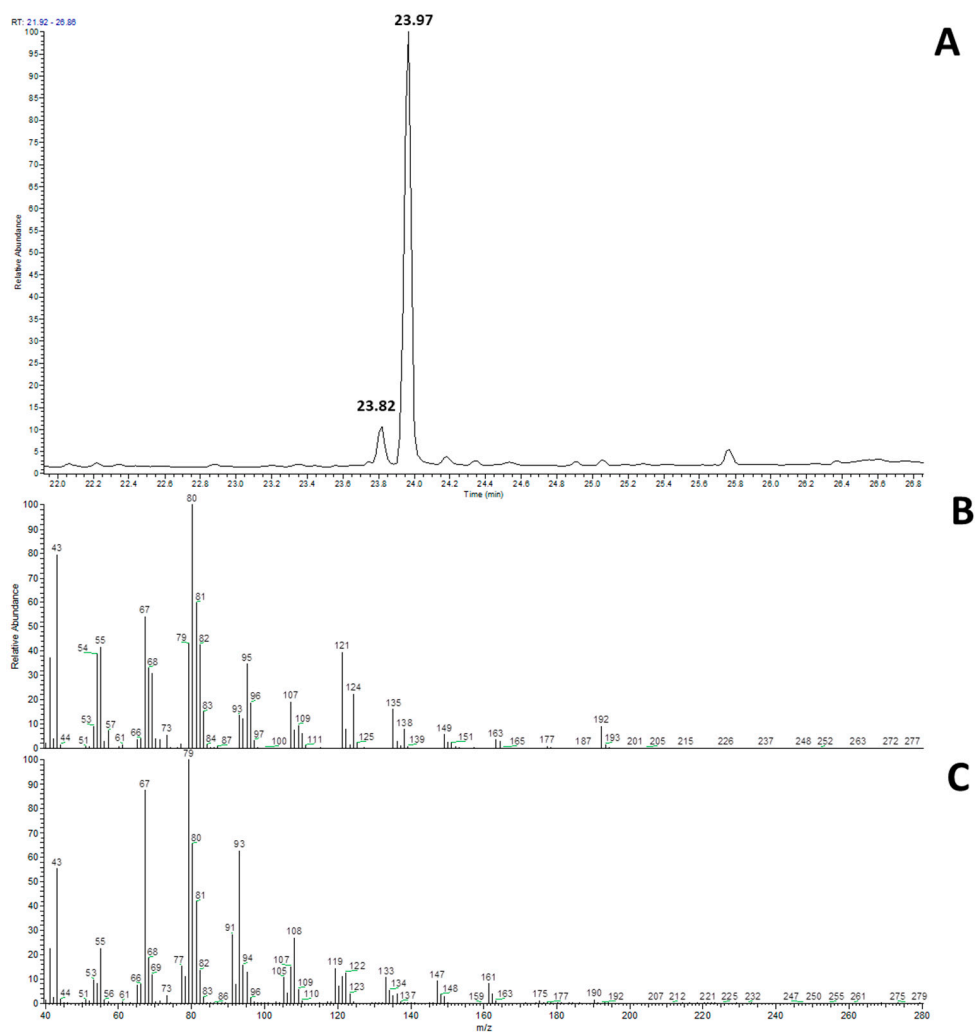

**Figure S1.** A) Partial GLC analysis of a female gland extract of *Tuta absoluta*. B,C) Mass spectra of peaks at retention times 23.82 and 23.97 min correspond to the pheromone components (*E*3,*Z*8,*Z*11)-tetradecatrien-1-yl acetate (*E*3,*Z*8,*Z*11-14:Ac) and (*E*3,*Z*8)-tetradecadien-1-yl acetate, respectively

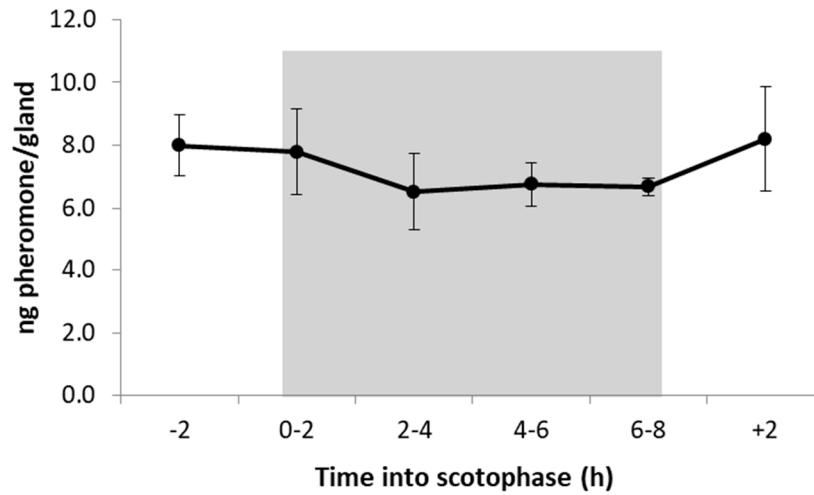

**Figure S2.** Pheromone contents ( $\pm$  SE) of 2-day-old virgin females (N=5) at 2 h intervals before, during and after the scotophase (shaded grey area).

**Table S1.** Mean amount ( $\pm$ SD) of the pheromone components TDTA and TDDA detected in gland extracts of virgin and mated *T. absoluta* females<sup>a</sup> in the presence/absence of plant.

| Presence of plant |                       | TDTA<br>(ng/gland) |                  | TDDA<br>(ng/gland) |                 |
|-------------------|-----------------------|--------------------|------------------|--------------------|-----------------|
|                   |                       | Virgin             | Mated            | Virgin             | Mated           |
| Without           |                       | 5.5 $\pm$ 0.5D     | 12.5 $\pm$ 1C    | 0.6 $\pm$ 0.1 c    | 0.9 $\pm$ 0.1bc |
| With              | Only olfaction        | 12.9 $\pm$ 1.1BC   | 12.7 $\pm$ 1.9BC | 1.0 $\pm$ 0.3bc    | 1.1 $\pm$ 0.1bc |
|                   | Only contact          | 12.6 $\pm$ 1.5BC   | 11.4 $\pm$ 0.8C  | 1.0 $\pm$ 0.2 bc   | 0.9 $\pm$ 0.1bc |
|                   | Olfaction/<br>contact | 26.3 $\pm$ 1.8A    | 17.1 $\pm$ 1.7B  | 2.6 $\pm$ 0.1 a    | 1.2 $\pm$ 0.1b  |

<sup>a</sup>Values within the same mating status followed by different letters are significantly different ( $P < 0.05$ , Kolmogorov-Smirnov test for TDTA, Tukey's test for TDDA).

**Table S2.** Mean EAG response difference of virgin and mated *T. absoluta* males to 1  $\mu$ g of TDTA at different times vs at T = 0<sup>a</sup>.

| Time (min) | Response difference (mV) | CI <sup>b</sup> |
|------------|--------------------------|-----------------|
| 9 vs 0     | -0.037                   | (-1.22 ; 1.15)  |
| 13 vs 0    | 0.19                     | (-0.98 ; 1.36)  |
| 19 vs 0    | 0.89                     | (-0.31 ; 2.09)  |
| 24 vs 0    | 1.85*                    | (0.68 ; 3.019)  |
| 33 vs 0    | 2.64*                    | (1.47 ; 3.81)   |

<sup>a</sup>Asterisks denote statistical significance at  $\alpha = 0.05$  level.

<sup>b</sup>95% Confidence interval.
